# Supplementary material for: Carbon dot-doped sodium borosilicate gel glasses with emission tunability and their application in white light emitting diodes
Source: Royal Society of Chemistry journal article supplement (doi:10.1039/c5tc00918a), 2015-01-01
Supplement: c5tc00918a1.pdf [file c5tc00918a1.pdf]

*Electronic Supporting Information*

**Carbon dot doped sodium borosilicate gel glasses with emission tunability and their application in white light emitting diodes†**

**Li Ma, Weidong Xiang\*, Haihong Gao, Lang Pei, Xin Ma, Yunyun Huang, Xiaojuan Liang\***

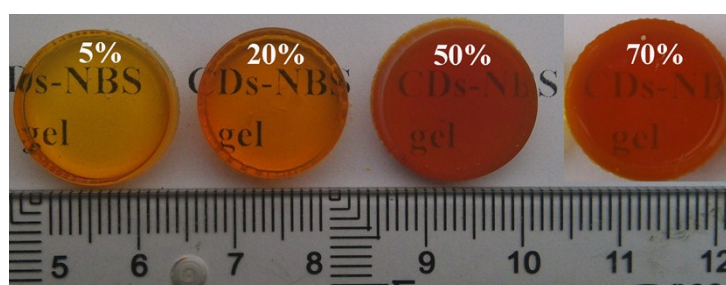

**Fig. S1** Optical photographs upon visible light of CD-NBS gels doped with various ratios of CDs (drying temperature 100 °C)

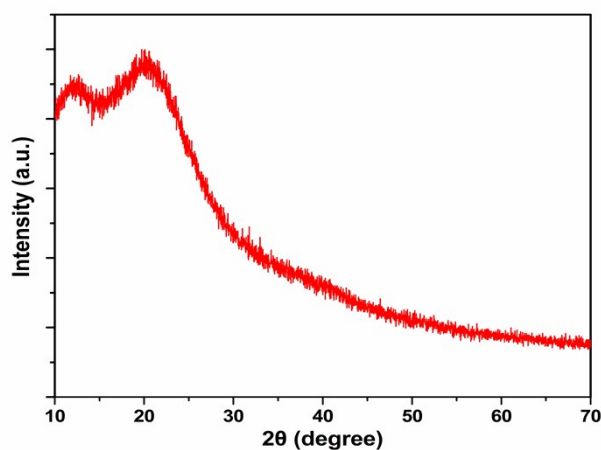

**Fig.S2** XRD pattern of CDs

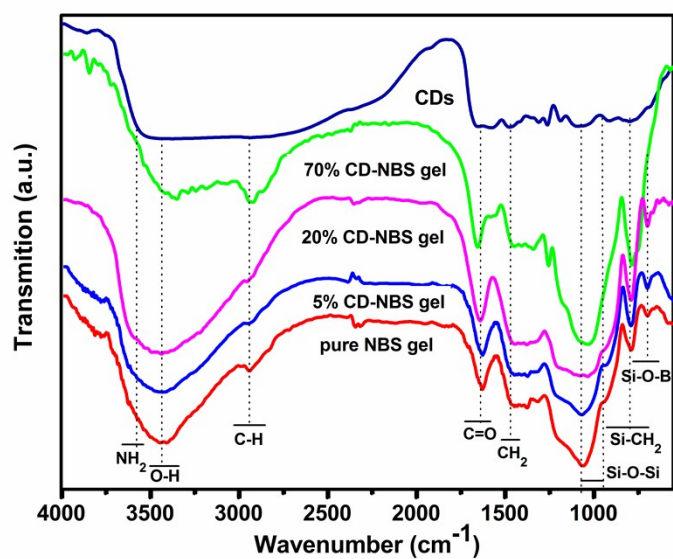

**Fig. S3** FTIR spectra of CDs, pure NBS gel, and CD-NBS gel with different ratios of CDs

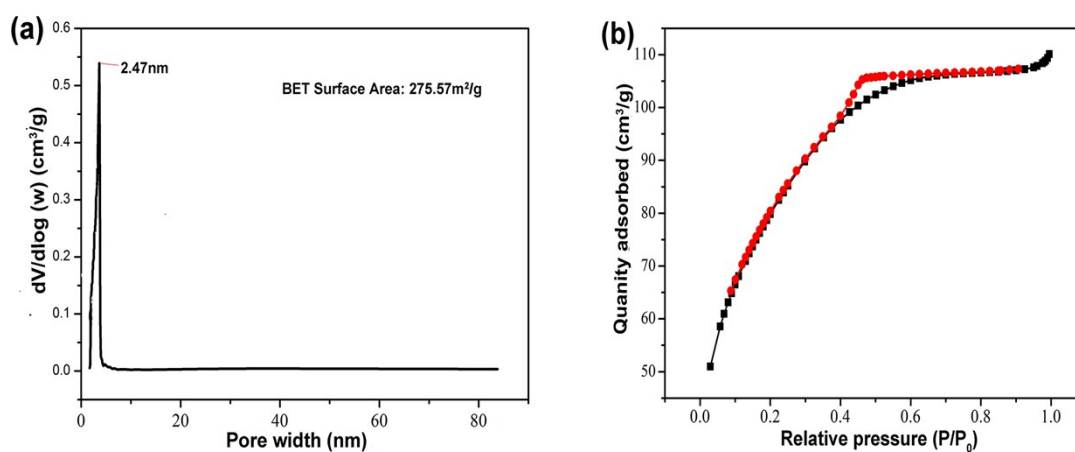

**Fig. S4** Pore size distribution curve and (b) nitrogen adsorption-desorption isotherm of the CD-NBS gel

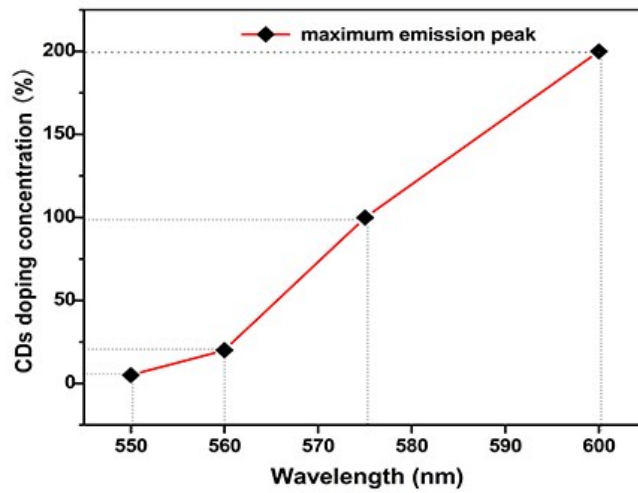

**Fig.S5** The main emission peak of CD-NBS gel with different loading fraction of CDs

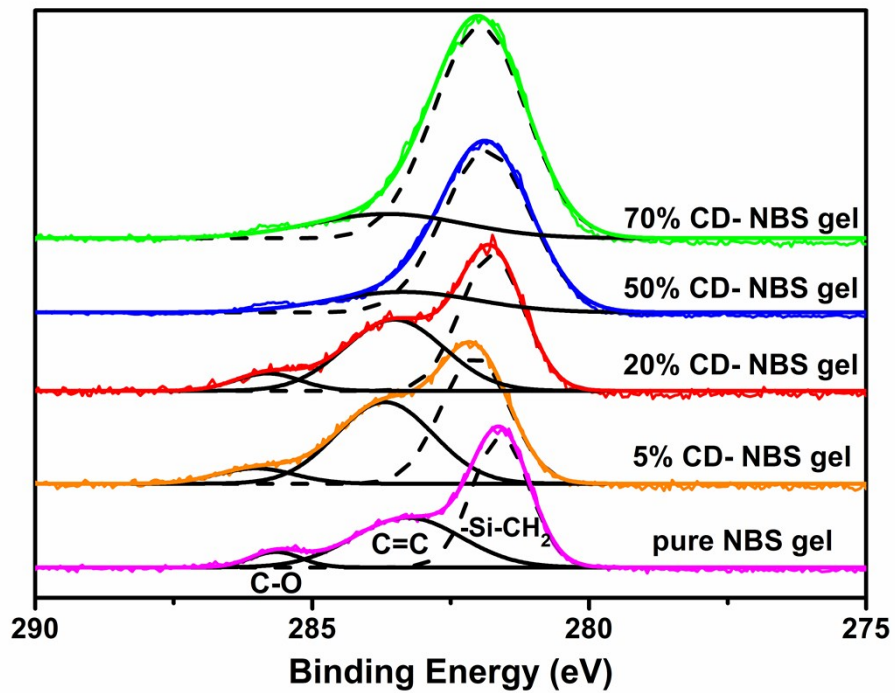

**Fig. S6** High-resolution XPS spectra of C 1s level for pure NBS gel and CD-NBS gels with different ratios of CDs
