# Supplementary figures and images for: Carbon dot-doped sodium borosilicate gel glasses with emission tunability and their application in white light emitting diodes
Source: Royal Society of Chemistry journal article supplement (doi:10.1039/c5tc00918a), 2015-01-01

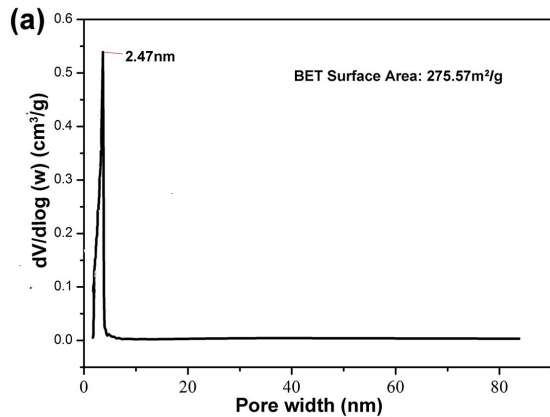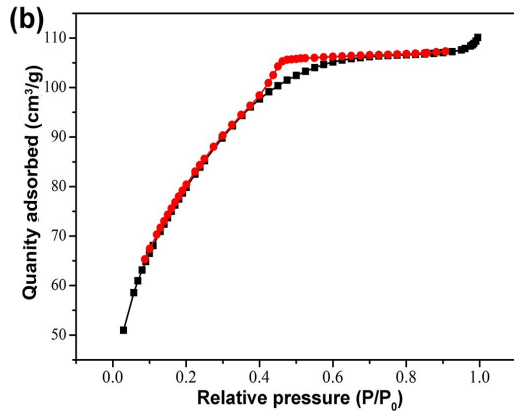

Supplement: c5tc00918a2.pdf [file c5tc00918a2.pdf]

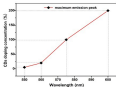

Supplement: c5tc00918a3.pdf [file c5tc00918a3.pdf]

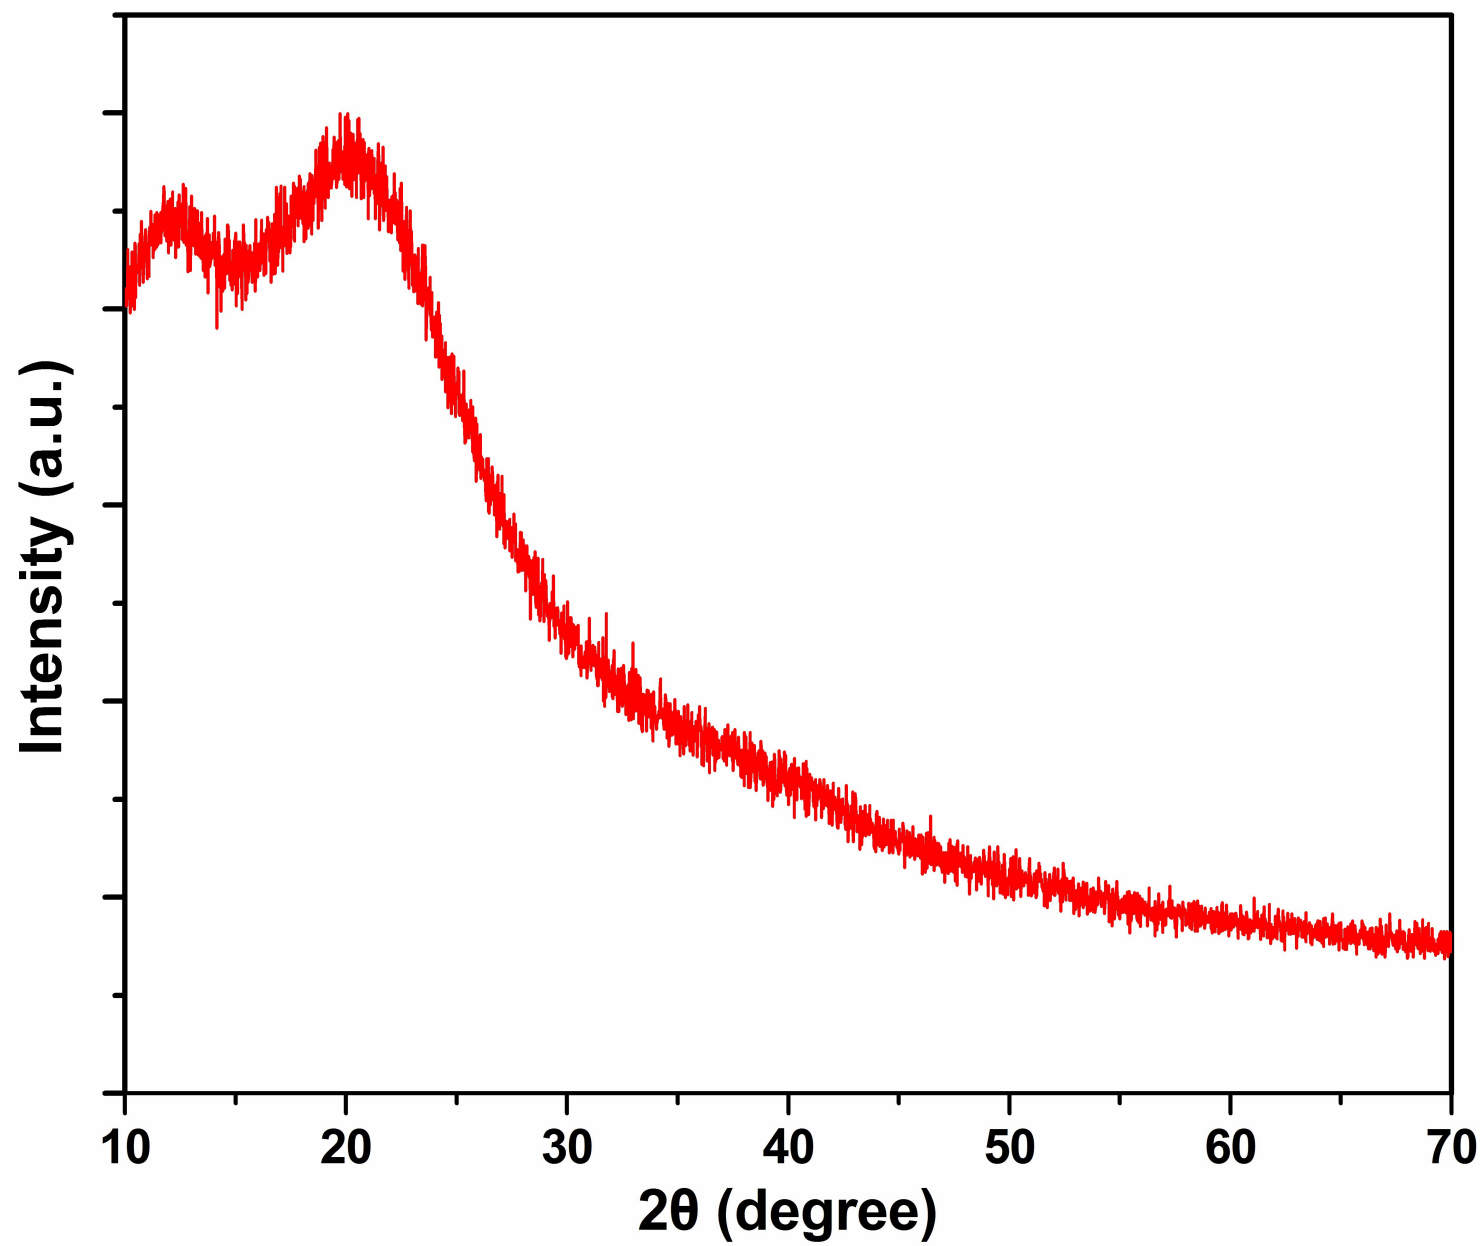

Supplement: c5tc00918a4.pdf [file c5tc00918a4.pdf]

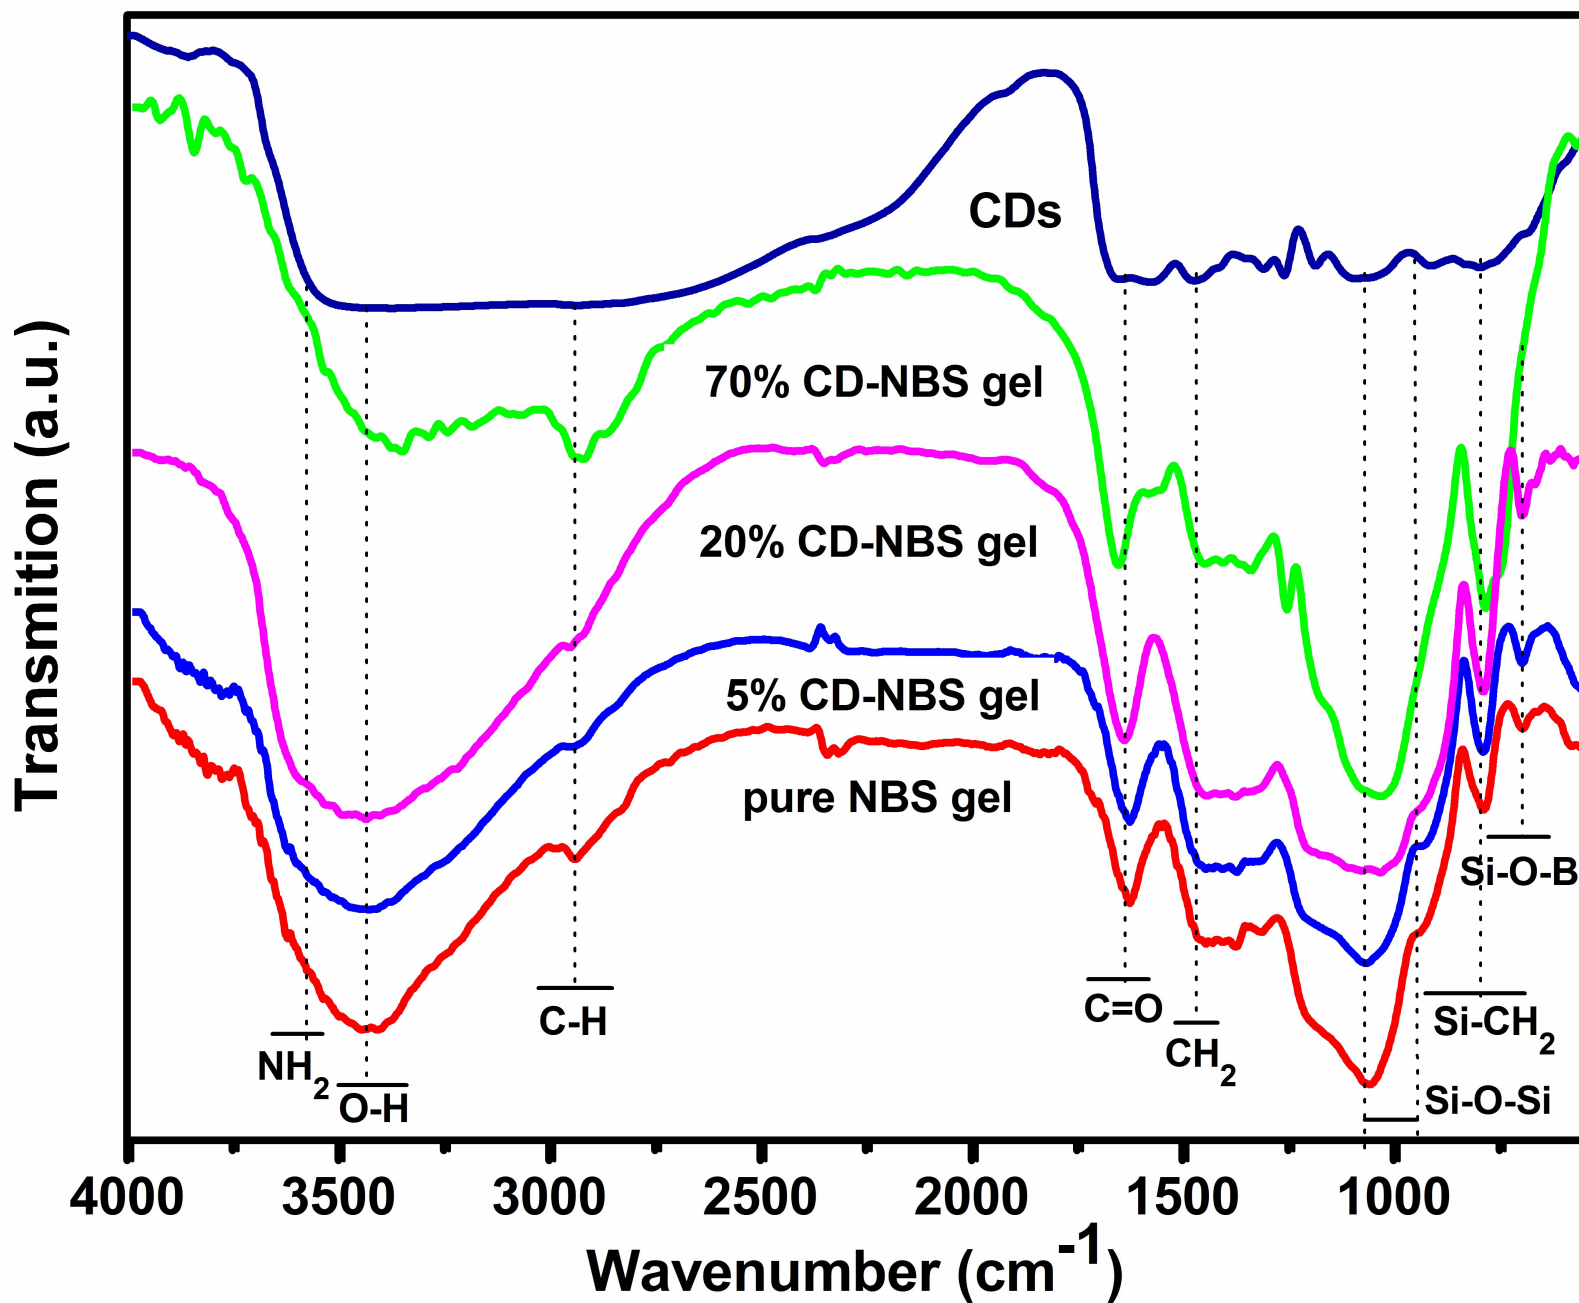

Supplement: c5tc00918a5.pdf [file c5tc00918a5.pdf]

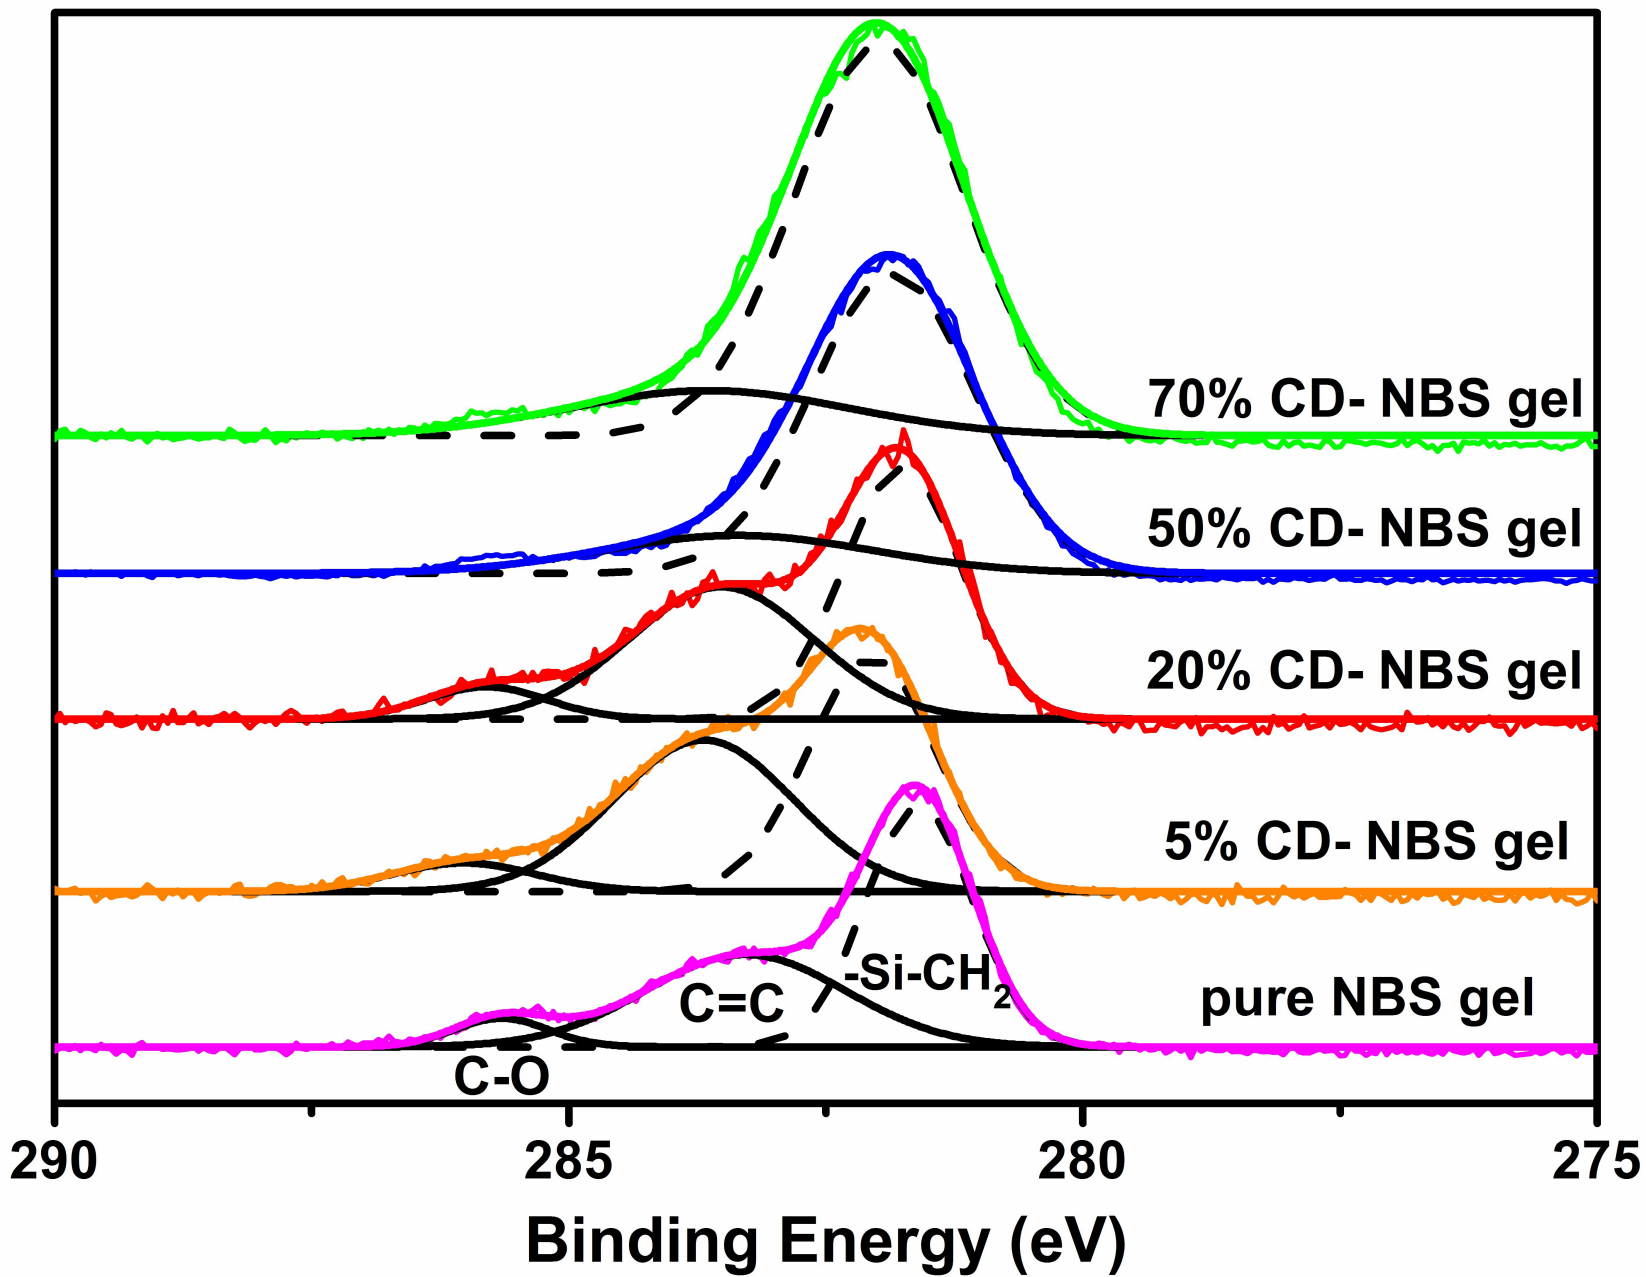

Supplement: c5tc00918a6.pdf [file c5tc00918a6.pdf]

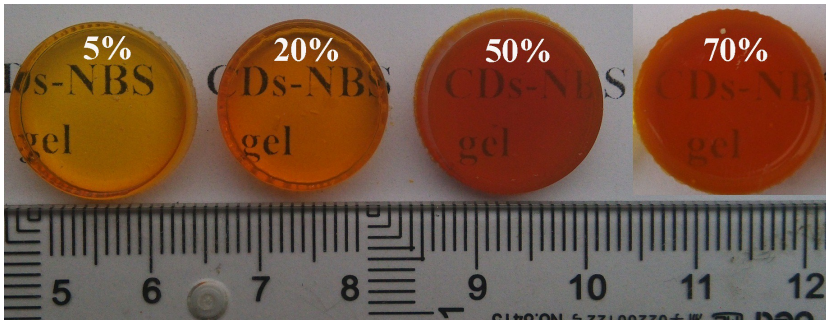

Supplement: c5tc00918a7.pdf [file c5tc00918a7.pdf]
